# Supplementary material
Source: PubMed Central journal article supplement (PMC5071563)

**LZR**

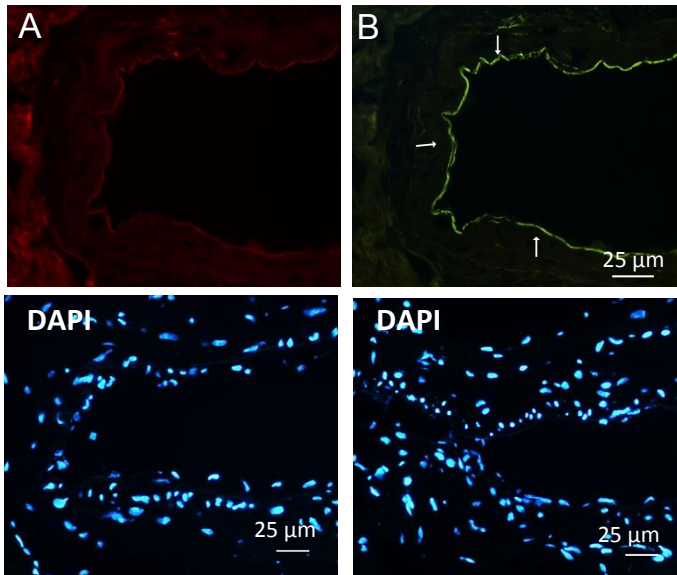

**OZR**

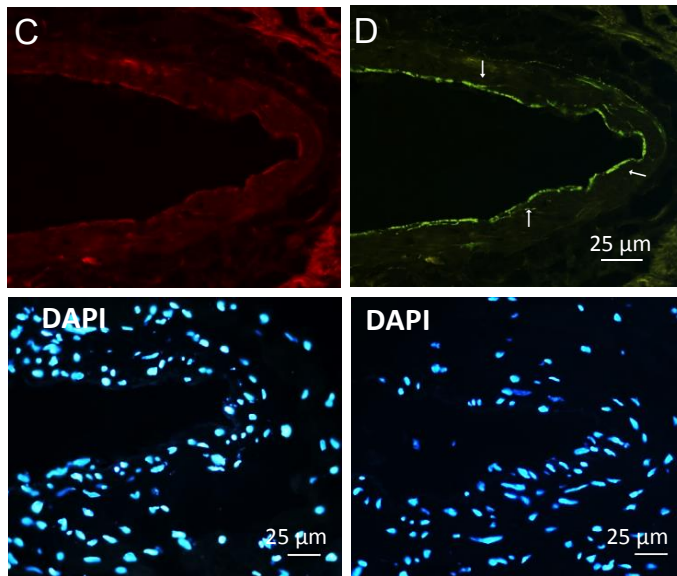

Supplement: BPH-173-3176-s001.pdf [file BPH-173-3176-s001.pdf]

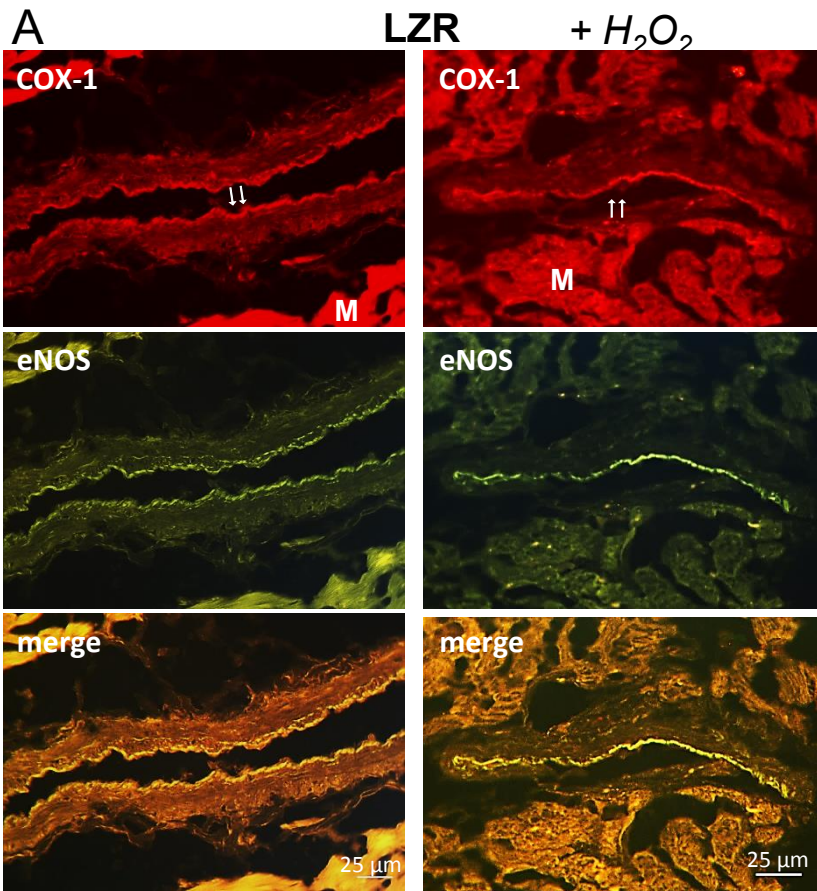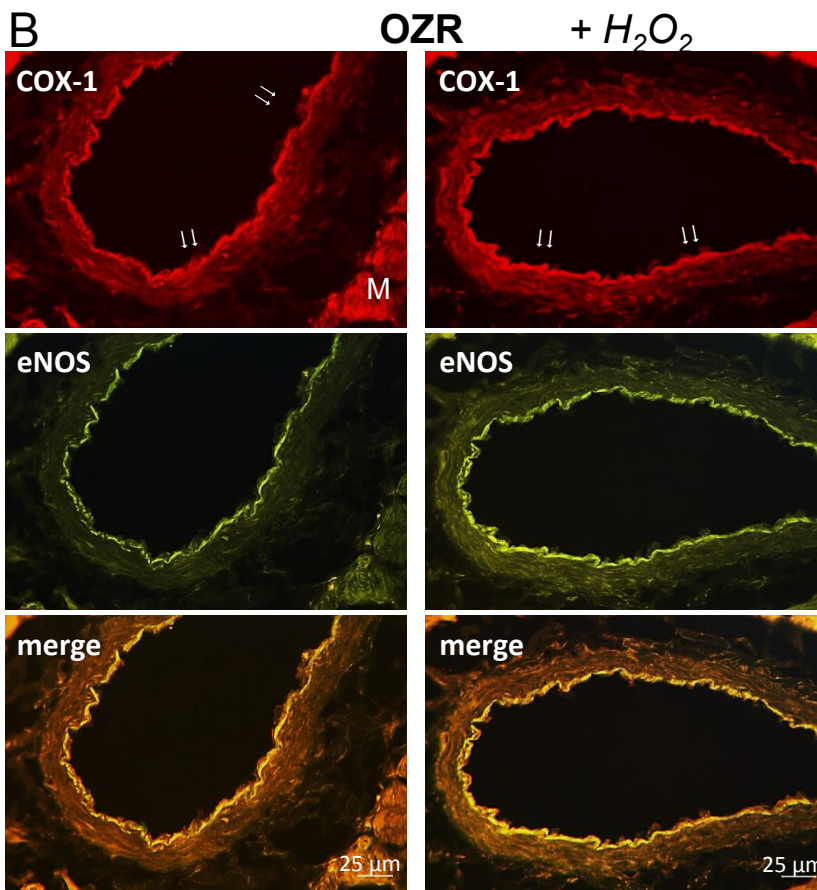

Supplement: BPH-173-3176-s002.pdf [file BPH-173-3176-s002.pdf]

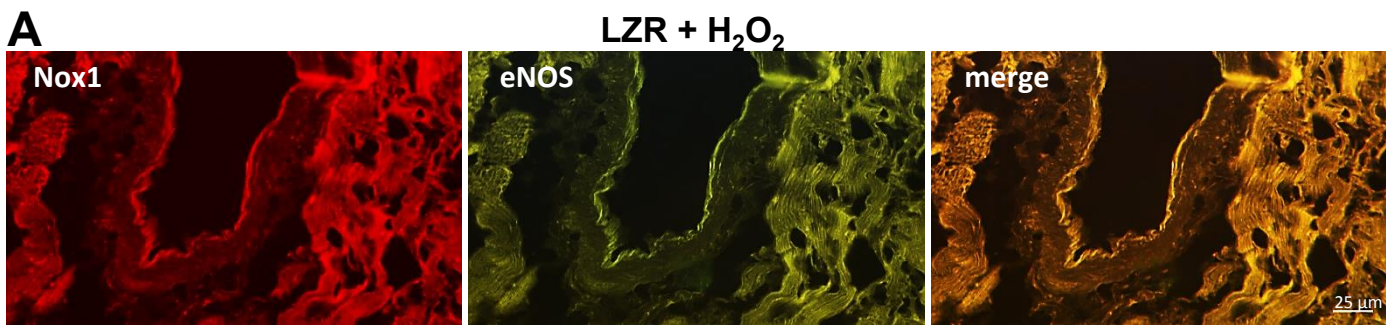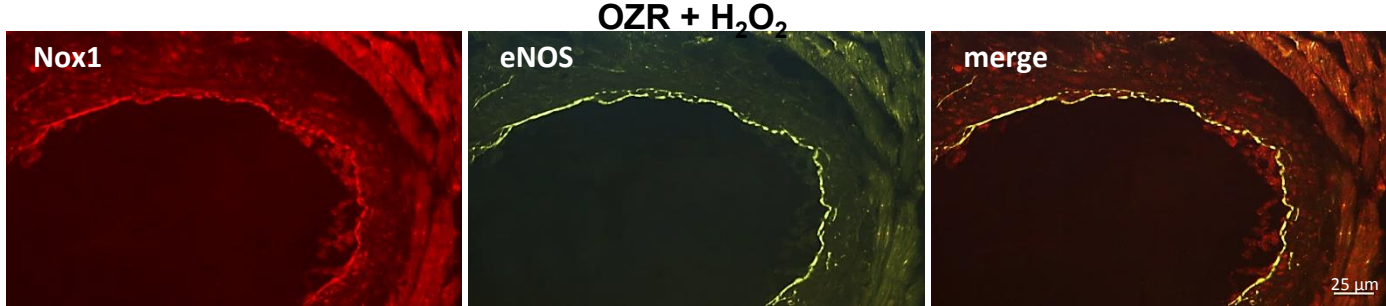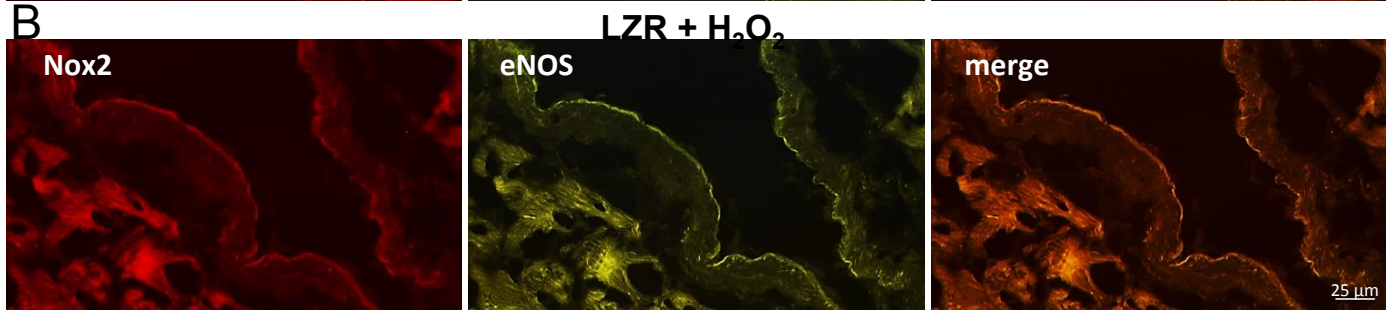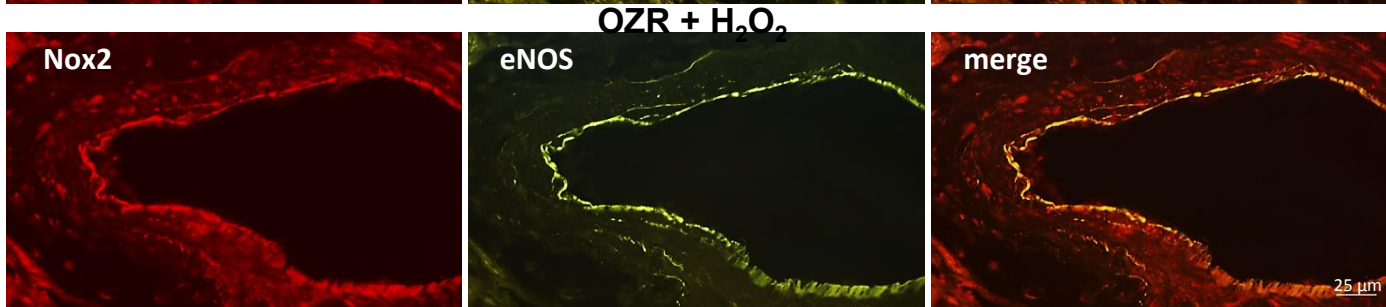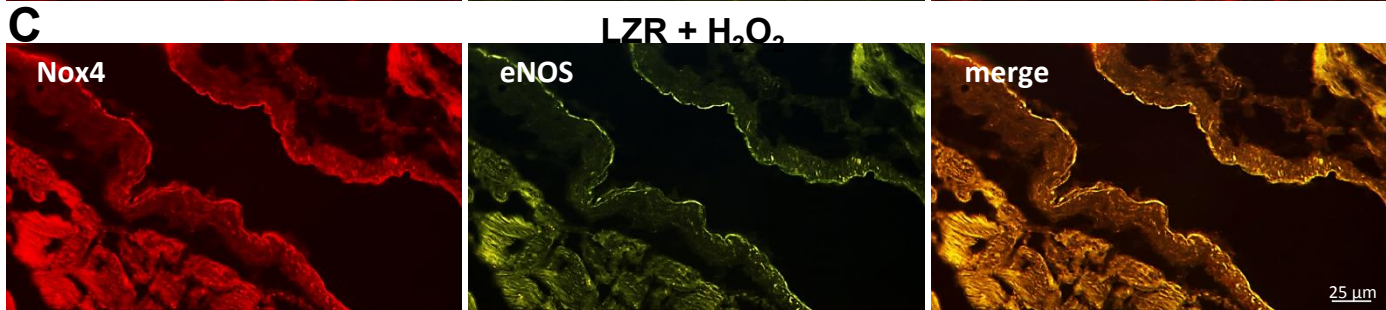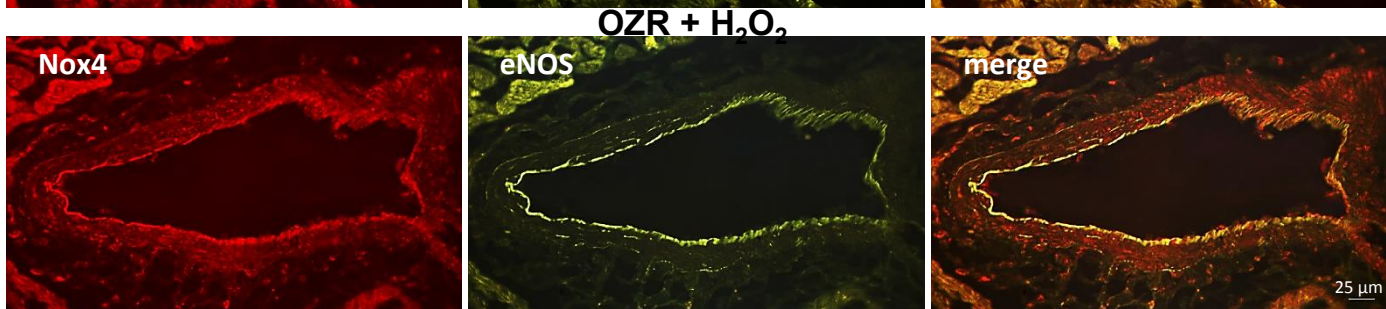

Supplement: BPH-173-3176-s003.pdf [file BPH-173-3176-s003.pdf]
